# Supplementary material for: Evidence for Cascades of Perturbation and Adaptation in the Metabolic Genes of Higher Termite Gut Symbionts
Source: PubMed Central journal article supplement — mBio. 2012 Aug 21;3(4):e00223-12. doi: 10.1128/mBio.00223-12 (PMC3428693; doi:10.1128/mbio.00223-12), 2012-08-21
Supplement: mbo004121314sf01.pdf [file mbo004121314sf01.pdf]

**Figure S1.** Mitochondrial cytochrome oxidase II (COII) phylogeny of termites and related roaches. Family names and other descriptions are located on the right side of the tree. Only two of four subfamilies (*Macrotermitinae*, *Apicotermitinae*, *Nasutitermitinae*, and *Termitinae*) in the higher termite family *Termitidae* are shown. Subfamily *Termitinae* is paraphyletic (1). The gut communities of insect species highlighted in red have been examined for *fdhF* using inventory and/or PCR screening techniques. Tree was constructed with 393 aligned nucleotides using the maximum likelihood phylogenetic algorithm AxML (2). Filled circles at nodes indicate support from PHYML, parsimony (Phylip DNAPARS), and Fitch distance methods. Scale bar corresponds to 0.1 nucleotide changes per alignment position.

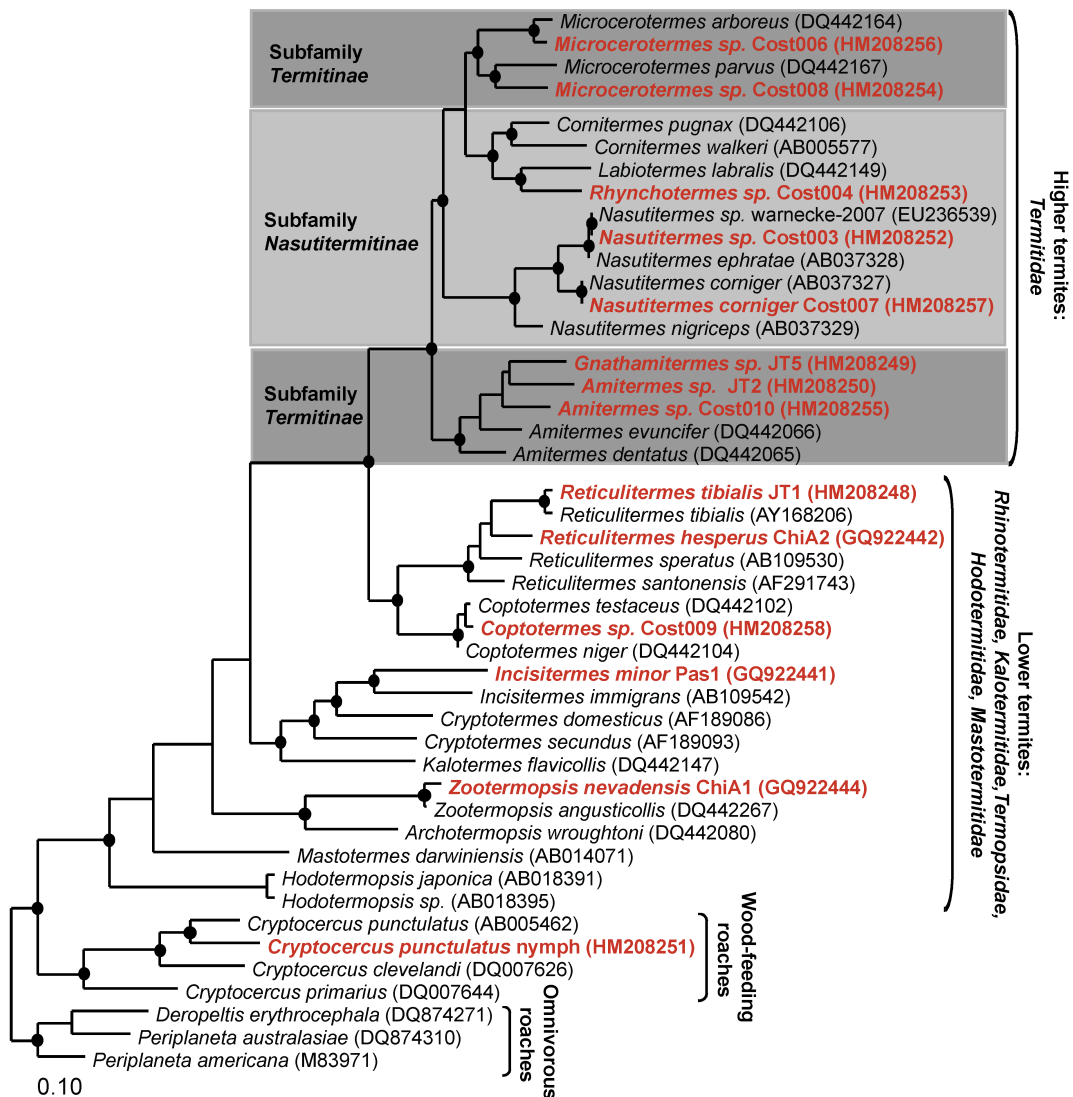

1. **Kambhampati S, Eggleton P.** 2000. Taxonomy and phylogeny of termites, p. 1-24. *In* T. Abe, D. E. Bignell, and M. Higashi (ed.), *Termites: Evolution, Sociality, Symbioses, Ecology*. Kluwer Academic Publishers, Dordrecht, The Netherlands.
2. **Stamatakis AP, Ludwig T, Meier H.** 2004. The AxML program family for maximum likelihood-based phylogenetic tree inference. *Concurrency Computat.: Pract. Exper.* **16**:975-988.
