# Supplementary material for: Evidence for Cascades of Perturbation and Adaptation in the Metabolic Genes of Higher Termite Gut Symbionts
Source: PubMed Central journal article supplement — mBio. 2012 Aug 21;3(4):e00223-12. doi: 10.1128/mBio.00223-12 (PMC3428693; doi:10.1128/mbio.00223-12), 2012-08-21

**Figure S3.** Products from nested PCR reactions using (i) universal *fdhF* primers followed by (ii) *Amitermes-Gnathamitermes-Rhychoitermes* clade specific primers on gut templates. NEB 2 log ladder was used. See Fig. S1 for template designations. Slight band in lane Zn was observed inconsistently and infrequently and is attributed to contamination during nested PCR.

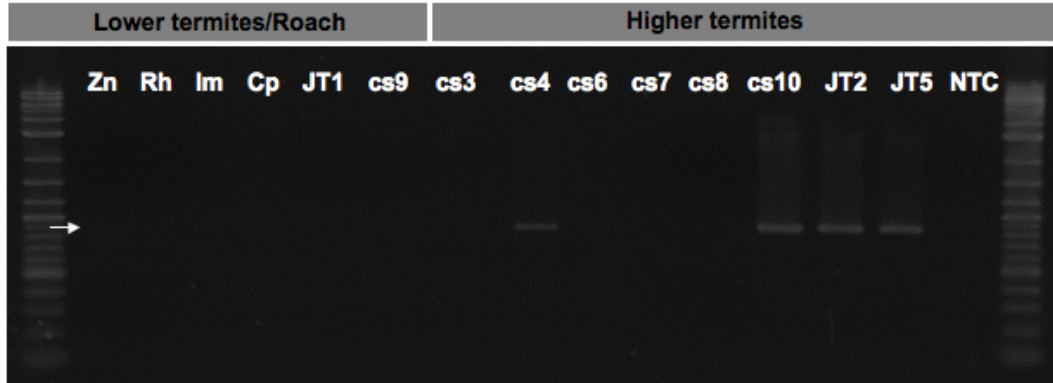

Supplement: mbo004121314sf03.pdf [file mbo004121314sf03.pdf]
